# Supplementary material
Source: publisher figshare collection journal article supplement (https://acs.figshare.com/ndownloader/files/9751219)
Supplement: Supplementary file 1 [file 9751219]

# Supplementary Information

## High pressure behavior of silver fluorides up to 40 GPa

**Adam Grzelak<sup>a, b</sup>, Jakub Gawraczyński<sup>a, b</sup>, Tomasz Jaroń<sup>b</sup>, Dominik Kurzydłowski<sup>b</sup>,  
Armand Budzianowski<sup>b</sup>, Zoran Mazej<sup>c</sup>, Piotr J. Leszczyński<sup>b</sup>, Vitali B. Prakapenka,<sup>d</sup>  
Mariana Derzsi<sup>b\*</sup>, Viktor V. Struzhkin<sup>e\*</sup>, and Wojciech Grochala<sup>b\*</sup>**

<sup>a</sup>Faculty of Chemistry, University of Warsaw, ul. Pasteura 1, 02-093 Warsaw, Poland.

<sup>b</sup>Center of New Technologies, University of Warsaw, ul. Banacha 2C, 02-097 Warsaw, Poland.

<sup>c</sup>Department of Inorganic Chemistry and Technology, Jožef Stefan Institute, Jamova cesta 39, SI-1000 Ljubljana, Slovenia.

<sup>d</sup>Center for Advanced Radiation Sources, University of Chicago, Chicago, IL 60637, United States.

<sup>e</sup>Geophysical Laboratory, Carnegie Institution of Washington, 5251 Broad Branch Road NW, Washington, DC 20015, United States.

### Contents.

**S1. Equation of state of AgF.**

**S2. Rietveld fits to the collected XRDPs for characteristic pressure points.**

**S3. Lattice constants of AgF<sub>2</sub> at different pressures obtained from XRD experiments.**

**S4. Theoretical enthalpies of the relevant structures.**

**S5. The closest F...F contacts in the observed crystal structures.**

**S6. Raman spectroscopy of AgF and AgF<sub>2</sub>.**

**S7. Electronic band gap at the Fermi level (theoretical DFT+U data).**

**S8. Analysis of phonons of HP-II phase at 20 GPa and 200 GPa.**

**S9. The .cif file of the HP-II structure at 250 GPa (theoretical DFT+U data).**

## S1. Equation of state of AgF.

AgF has been previously studied under high pressure and is known to undergo a phase transition at pressure ca. 2.7 GPa from rocksalt structure to the more closely packed CsCl-type structure.<sup>1</sup> In one of our XRD experiments, we compressed a sample that turned out to consist mostly of AgF – a product of *in situ* decomposition of AgF<sub>2</sub>. We studied its XRD pattern up to ca. 39 GPa and determined equation of state (EoS) parameters of the CsCl-type structure. Pressure dependence of volume of CsCl-type unit cell of AgF is shown in SI. The data was fitted with Birch-Murnaghan (B-M) EoS<sup>2</sup> – its parameters are given in table 1.

| $V_0$ [Å <sup>3</sup> ] | $B_0$ [GPa] | $B_0'$  | $B_0$ [GPa] (Ref. <sup>1</sup> ) |
|-------------------------|-------------|---------|----------------------------------|
| 26.673(9)               | 87.1(2)     | 5.26(3) | 110                              |

Table S1. Birch-Murnaghan equation of state parameters for CsCl-type AgF.  $V_0$  – reference volume,  $B_0$  – bulk modulus,  $B_0'$  – pressure derivative of bulk modulus.

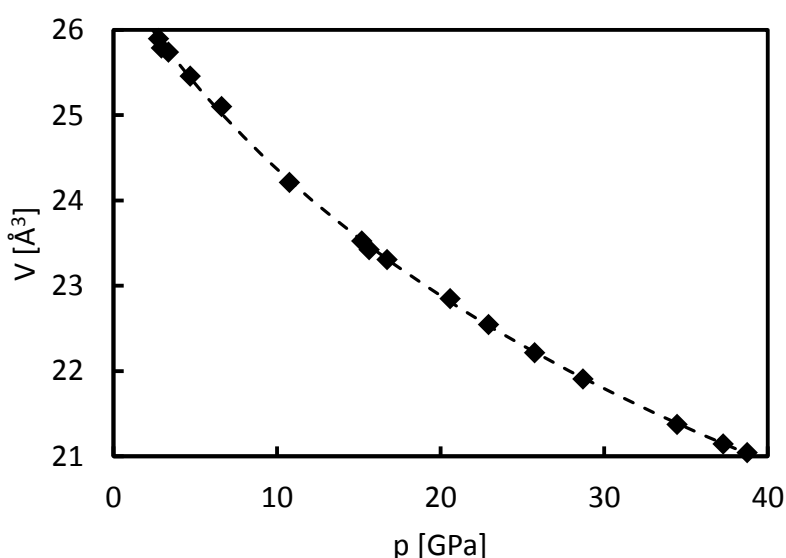

Fig. S1. Pressure dependence of volume of AgF unit cell (CsCl-type structure). Dashed line – B-M EoS fit.

## S2. Rietveld fits to the collected XRDs for characteristic pressure points.

Rietveld fits were performed using “Jana2006” software.<sup>3</sup>

### S2.1. Rietveld fit for LP structure at 8.5 GPa.

Fit parameters and appearance is presented in Table S2.1 and Fig. S2.1.

|                         | GOF  | $R_p$ | $R_{wp}$ |
|-------------------------|------|-------|----------|
| <b><i>Pbca</i> (LP)</b> | 0.53 | 0.81% | 1.24%    |

Table S2.1. Fit parameters for *Pbca* (LP) structure of AgF<sub>2</sub> at 8.5 GPa.

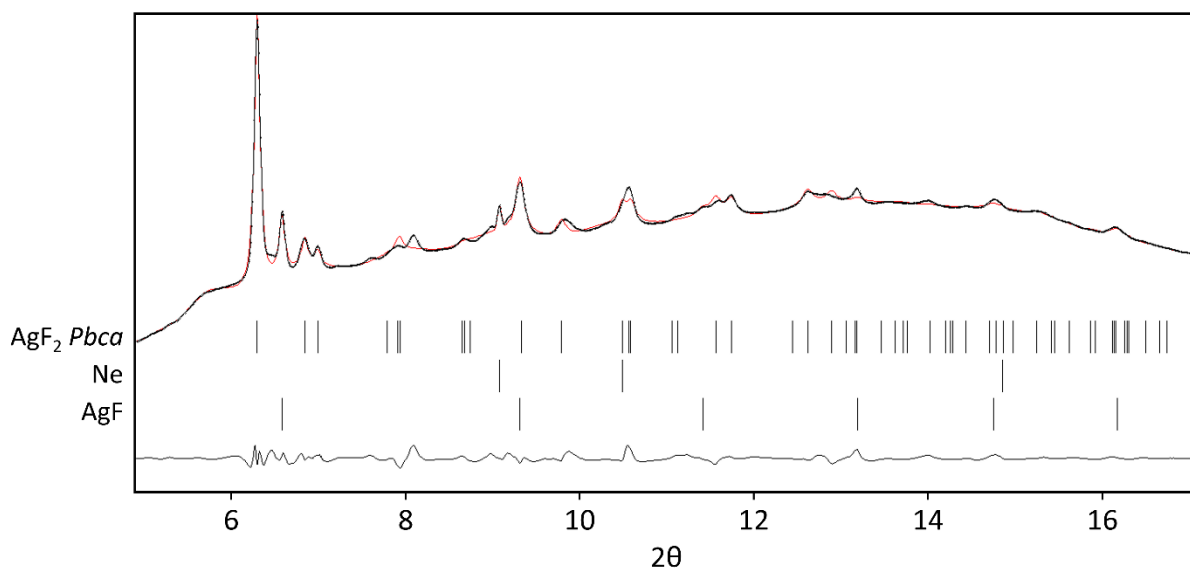

**Figure S2.1.** Rietveld fit at 8.5 GPa ( $\lambda = 0.3344 \text{ \AA}$ ).

## S2.2 Comparison of Rietveld fits for LP and HP-I structure at 11.7 GPa.

Fit parameters and appearance are compared in Table S2.2 and Fig. S2.2.

|                                       | GOF  | $R_p$ | $R_{wp}$ |
|---------------------------------------|------|-------|----------|
| <b><i>Pbca</i> (LP)</b>               | 0.18 | 0.68% | 0.96%    |
| <b><i>Pca2</i><sub>1</sub> (HP-I)</b> | 0.13 | 0.51% | 0.70%    |

Table S2.2. Fit parameters for *Pbca* (LP) and *Pca2*<sub>1</sub> (HP-I) structure of  $\text{AgF}_2$  at 11.7 GPa.

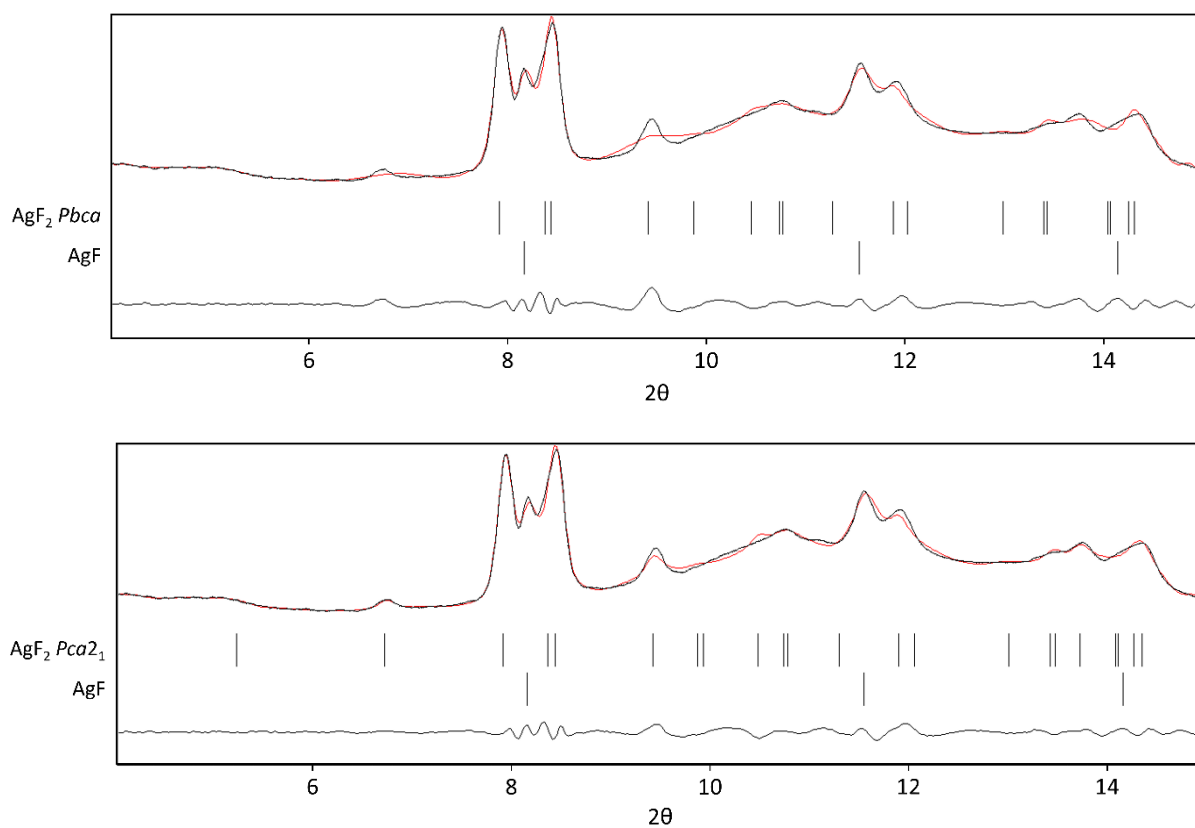

**Figure S2.2.** Rietveld fits at 11.7 GPa. Top: LP (*Pbca*); bottom: HP-I (*Pca2*<sub>1</sub>) ( $\lambda = 0.4113 \text{ \AA}$ ).

### S2.3. Rietveld fit for HP-II structure at 36.2 GPa.

Fit parameters and appearance is presented in Table S2 and Fig. S2.

|                            | GOF  | $R_p$ | $R_{wp}$ |
|----------------------------|------|-------|----------|
| <b><i>Pbcn</i> (HP-II)</b> | 0.30 | 0.29% | 0.44%    |

Table S2.3. Fit parameters for *Pbcn* (HP-II) structure of  $\text{AgF}_2$  at 36.2 GPa.

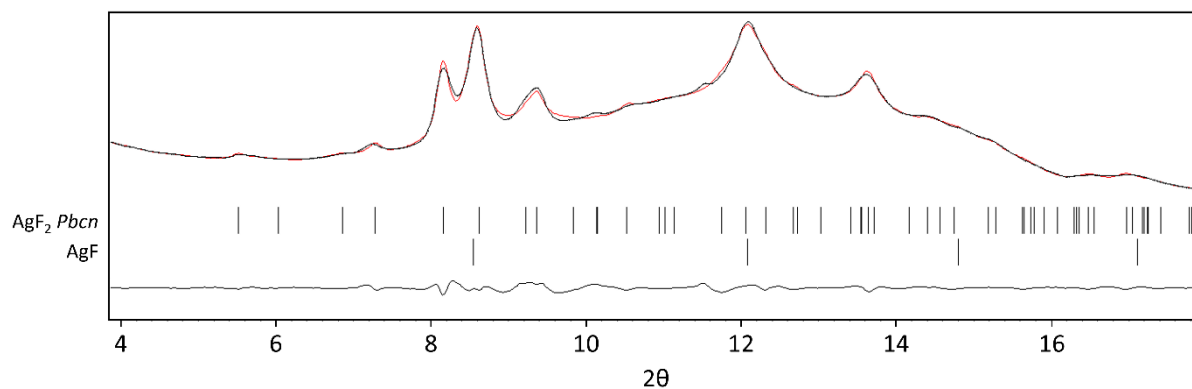

Figure S2.3. Rietveld fit at 36.2 GPa ( $\lambda = 0.4113 \text{ \AA}$ ).

### S3. Lattice constants of AgF<sub>2</sub> at different pressures obtained from XRD experiments.

Table S3.1. XRD-A data (compression only).

|       | p AgF | $\Delta p$ | a     | $\Delta a$ | b     | $\Delta b$ | c     | $\Delta c$ | V      | $\Delta V$ |
|-------|-------|------------|-------|------------|-------|------------|-------|------------|--------|------------|
| LP    | 4.9   | 0.1        | 5.485 | 0.001      | 5.656 | 0.001      | 4.965 | 0.002      | 154.03 | 0.10       |
|       | 8.5   | 0.2        | 5.477 | 0.003      | 5.592 | 0.003      | 4.831 | 0.003      | 147.93 | 0.03       |
| HP-I  | 10.0  | 0.5        | 5.475 | 0.007      | 4.704 | 0.006      | 5.564 | 0.006      | 143.32 | 0.10       |
|       | 13.5  | 0.6        | 5.572 | 0.008      | 4.513 | 0.007      | 5.523 | 0.007      | 138.88 | 0.09       |
| HP-II | 16.9  | 0.6        | 5.475 | 0.013      | 8.350 | 0.022      | 5.693 | 0.015      | 260.2  | 1.3        |
|       | 21.8  | 1.0        | 5.300 | 0.016      | 8.234 | 0.018      | 5.714 | 0.017      | 249.4  | 1.7        |
|       | 25.9  | 1.8        | 5.198 | 0.023      | 8.137 | 0.031      | 5.716 | 0.017      | 241.8  | 2.4        |

Table S3.2. XRD-B (compression and decompression).

|                 | p AgF | $\Delta p$ | a     | $\Delta a$ | b     | $\Delta b$ | c     | $\Delta c$ | V      | $\Delta V$ |
|-----------------|-------|------------|-------|------------|-------|------------|-------|------------|--------|------------|
| HP-I            | 11.7  | 0.5        | 5.585 | 0.007      | 4.500 | 0.008      | 5.634 | 0.007      | 141.58 | 0.08       |
| HP-II<br>comp   | 14.8  | 0.6        | 5.475 | 0.010      | 8.331 | 0.015      | 5.787 | 0.007      | 264.0  | 1.1        |
|                 | 25.3  | 0.8        | 5.301 | 0.010      | 8.100 | 0.016      | 5.777 | 0.009      | 248.1  | 1.2        |
|                 | 32.7  | 1.2        | 5.197 | 0.017      | 7.947 | 0.019      | 5.821 | 0.010      | 240.4  | 1.4        |
|                 | 36.2  | 0.8        | 5.129 | 0.010      | 7.849 | 0.011      | 5.803 | 0.007      | 233.6  | 0.8        |
| HP-II<br>decomp | 34.4  | 0.6        | 5.141 | 0.007      | 7.905 | 0.011      | 5.802 | 0.006      | 235.8  | 0.8        |
|                 | 32.8  | 1.1        | 5.173 | 0.015      | 7.920 | 0.020      | 5.810 | 0.010      | 238.1  | 1.4        |
|                 | 28.5  | 0.7        | 5.198 | 0.010      | 7.951 | 0.013      | 5.833 | 0.007      | 241.1  | 0.9        |
|                 | 24.6  | 0.9        | 5.250 | 0.015      | 8.011 | 0.020      | 5.858 | 0.010      | 246.4  | 1.5        |
|                 | 20.1  | 0.4        | 5.322 | 0.012      | 8.128 | 0.015      | 5.851 | 0.005      | 253.1  | 0.4        |
|                 | 16.5  | 0.3        | 5.355 | 0.009      | 8.305 | 0.013      | 5.836 | 0.010      | 259.5  | 0.4        |

#### S4. Theoretical enthalpies of the relevant structures.

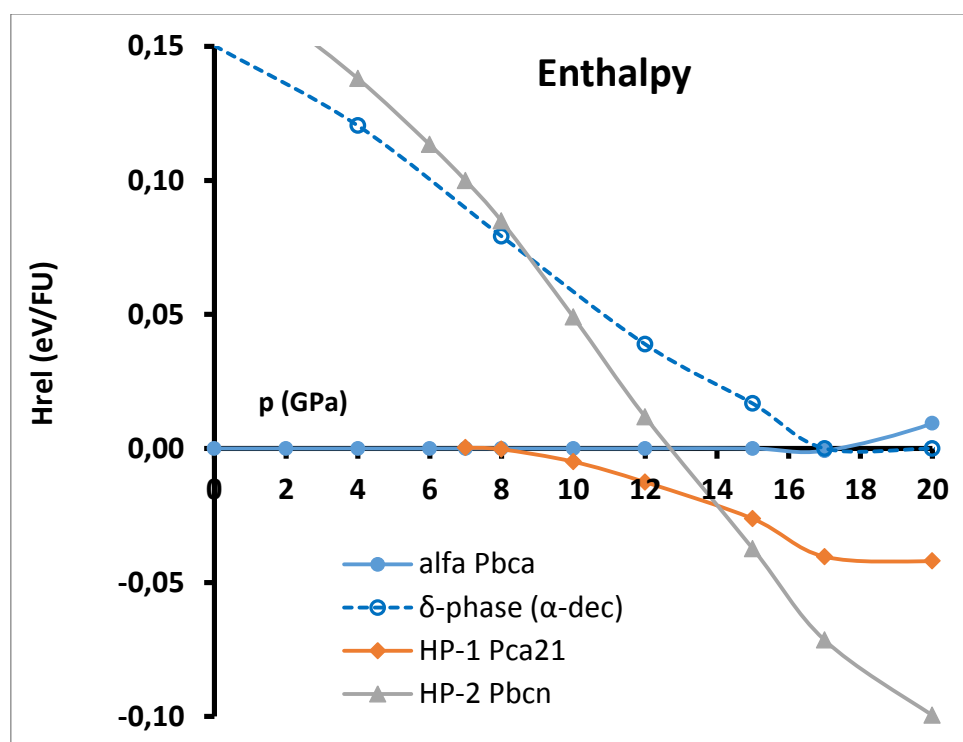

**Figure S4.1.** Pressure dependence of relative enthalpies of  $AgF_2$  structures (compared to LP-Pbca structure) in a narrower  $p$  range.  $\delta$  phase stands for flat layer form theorized in Ref.6.

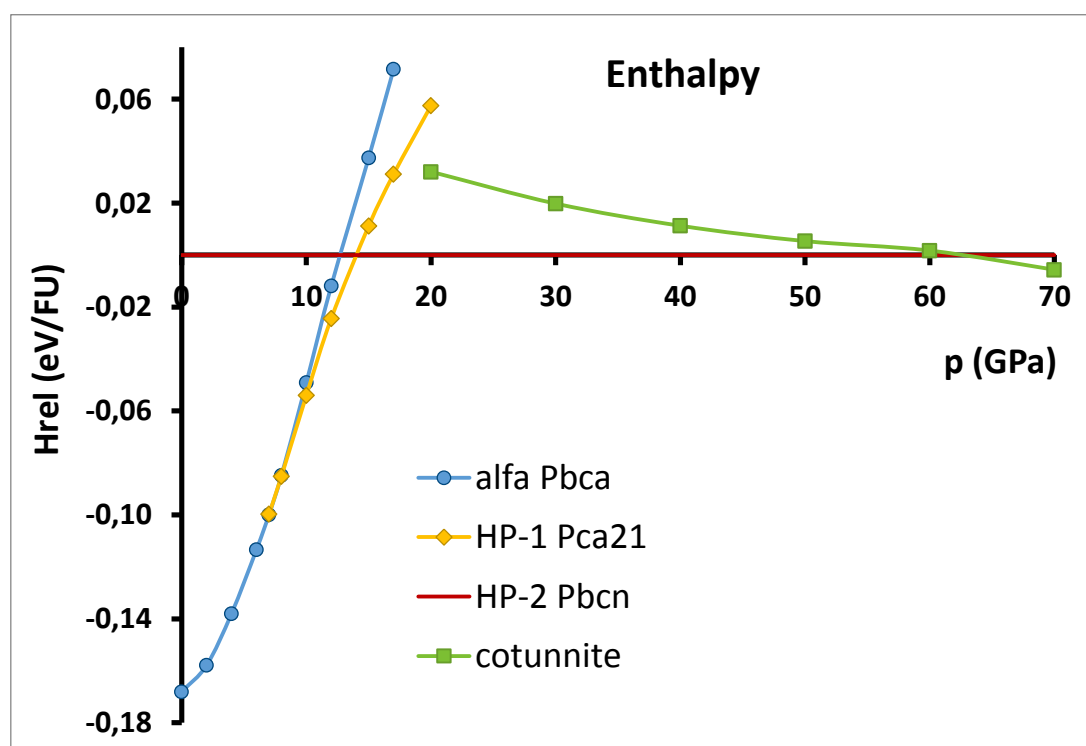

**Figure S4.2.** Pressure dependence of relative enthalpies of  $AgF_2$  structures (compared to HP-II structure) in a broader  $p$  range.

## S5. The closest F...F contacts in the observed crystal structures.

**Table S5.** Selected F...F contacts and torsional AgFFAg angle in the **HP-I** structure as calculated with DFT+U. See **Figure S5** below for geometry of the F...F contacts and the in-plane Ag-F...F-Ag angle. Within the pressure range 0-6 GPa the **HP-I** converges to the higher-symmetry **LP** phase. Note, twice the vdW radius of F is 2.96 Å at 1 atm.

| GPa | HP-I     |                           | LP       |                           | $F_2^\dagger$ |                               |
|-----|----------|---------------------------|----------|---------------------------|---------------|-------------------------------|
|     | F...F    | F...F <sup>shortest</sup> | F...F    | F...F <sup>shortest</sup> | F...F         | F-F <sup>intramolecular</sup> |
|     | in-plane | out-plain                 | in-plane | out-plain                 |               |                               |
| 0   | -        | -                         | -        | -                         | 3.014         | 1.388                         |
| 2   | -        | -                         | -        | -                         |               |                               |
| 4   | -        | -                         | -        | -                         |               |                               |
| 6   | -        | -                         | -        | -                         |               |                               |
| 7   | 2.891    | 2.914                     | 2.891    | 2.914                     |               |                               |
| 8   | 2.852    | 2.718                     | 2.852    | 2.718                     |               |                               |
| 10  | 2.766    | 2.664                     | 2.766    | 2.664                     | 2.394         | 1.383                         |
| 12  | 2.679    | 2.605                     | 2.679    | 2.605                     |               |                               |
| 15  | 2.602    | 2.553                     | 2.602    | 2.553                     |               |                               |
| 17  | 2.570    | 2.534                     | 2.570    | 2.534                     |               |                               |
| 20  | 2.535    | 2.519                     | 2.535    | 2.519                     | 2.275         | 1.379                         |

<sup>†</sup>Values for solid  $F_2$  under high pressure were calculated by Kurzydłowski and Zaleski-Ejgierd.<sup>4</sup>

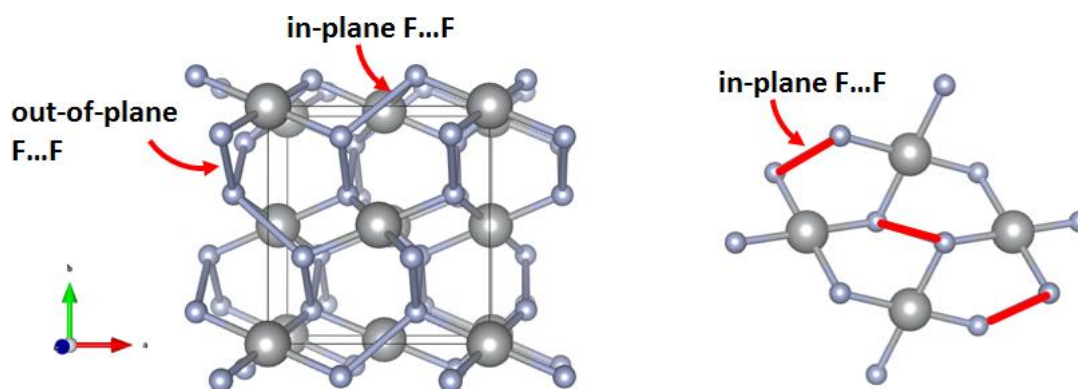

**Fig. S5.** Illustration of the in-plane and the shortest out-of-plain F...F contact between F atoms belonging to different  $AgF_4$  squares in the HP-I structure: 3D structure showing one unit cell (left) and single  $AgF_2$  layer (right). The in-plane F...F contact corresponds to the chalcogenide bond in cobaltite CoAsS. The in-plane Ag-F...F-Ag torsional angle is also highlighted (right). This figure should be read together with **Table S4**.

## S6. Raman spectroscopy of AgF and AgF<sub>2</sub>

To our knowledge, high-pressure Raman spectra of AgF have not been previously reported. Raman spectra of the high-pressure (CsCl-type) phase of AgF have been collected up to 27 GPa (see ESI). The most prominent feature of these spectra is the first overtone of the band assigned to infrared-active T<sub>1u</sub> mode. Pressure dependence of this band is plotted in fig. S6.

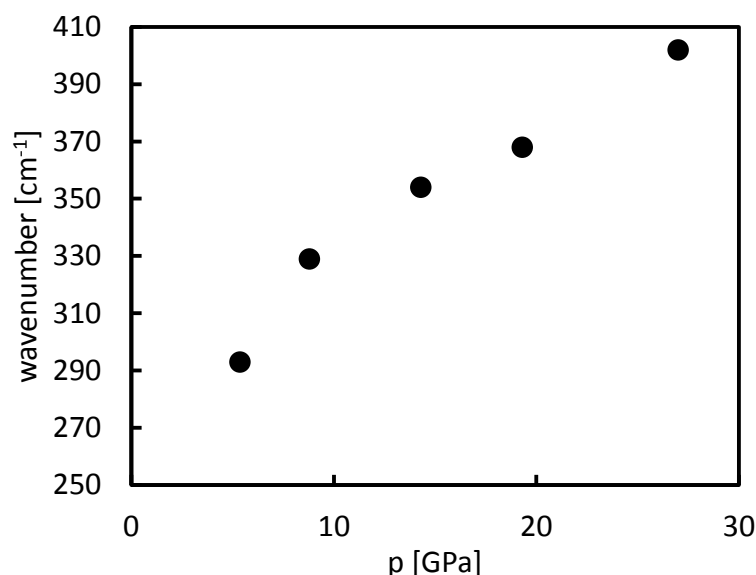

**Fig. S6.** Pressure dependence of the wavenumber of the Raman-active first overtone of the IR-active T<sub>1u</sub> mode of CsCl-type AgF phase.

Raman spectra obtained from compressed AgF<sub>2</sub> were collected using 514.5 nm laser line. The spectra are dominated by a band which appears at 420 cm<sup>-1</sup> at ambient pressure. The frequency of this band increases with compression up to 540 cm<sup>-1</sup> at 40 GPa. Interestingly, this band does not normally feature in Raman spectra of AgF<sub>2</sub>, but it has been reported in spectra of fluoroargentates such as KAgF<sub>3</sub> and K<sub>2</sub>AgF<sub>4</sub>, which contain complex [AgF<sub>3</sub>]<sup>-</sup> or [AgF<sub>4</sub>]<sup>2-</sup> anions.<sup>5</sup> It is possible that the sample compressed in this experiment decomposed as a result of irradiation with 514.5 nm laser, yielding a fluoroargentate product. More detailed studies of irradiated samples of AgF<sub>2</sub> are needed in order to elucidate the structure of this yet-unknown species.



**S7. Electronic band gap at the Fermi level (theoretical DFT+U data).**

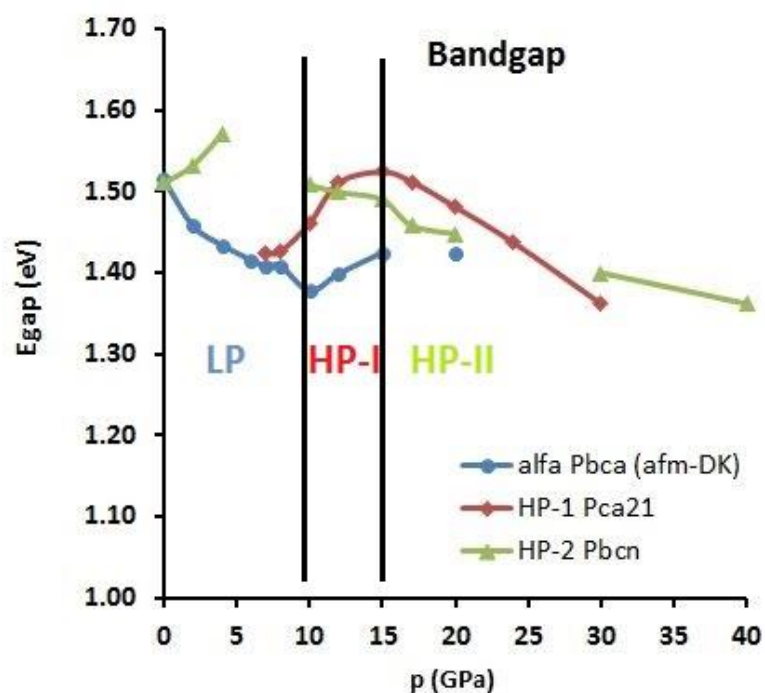

**Fig. S7.** The calculated band gap (DFT+U) for three experimentally observed forms of  $\text{AgF}_2$ ; the vertical lines mark the approximate stability ranges.

**S8. Analysis of phonons of HP-II phase at 20 GPa and 200 GPa.**

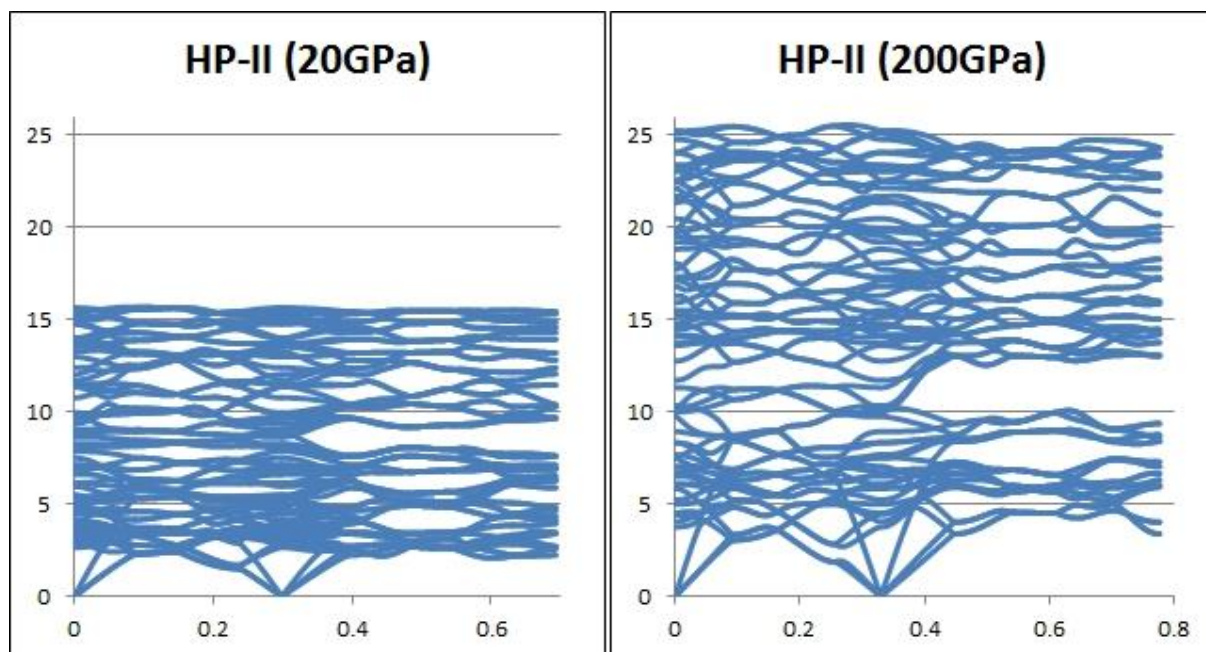

No imaginary modes have been detected for the HP-II phase at 200 GPa.

### S9. The .cif file of the HP-II structure at 250 GPa (theoretical DFT+U data).

```
_pd_phase_name          'HP-II 250 GPa DFT'
_cell_length_a          5.37061
_cell_length_b          6.69718
_cell_length_c          4.17178
_cell_angle_alpha       90
_cell_angle_beta        90
_cell_angle_gamma       90
_symmetry_space_group_name_H-M  'Pbcn'
_symmetry_Int_Tables_number 60

loop_
_atom_site_label
_atom_site_occupancy
_atom_site_fract_x
_atom_site_fract_y
_atom_site_fract_z
_atom_site_adp_type
_atom_site_B_iso_or_equiv
_atom_site_type_symbol
Ag1  1.0  0.572494  0.381317  0.015398  Biso 1.000000 Ag
F1   1.0  0.250000  0.385745  0.821412  Biso 1.000000 F
F2   1.0  0.404499  0.151591  0.141401  Biso 1.000000 F
```

### References:

- (1) Hull, S.; Berastegui, P. High-Pressure Structural Behaviour of silver(I) Fluoride. *J. Phys. Condens. Matter* **1998**, *10*, 7945–7955.
- (2) Birch, F. Finite Elastic Strain of Cubic Crystals. *Phys. Rev.* **1947**, *71*, 809–824.
- (3) Petříček, V.; Dušek, M.; Palatinus, L. Crystallographic Computing System JANA2006: General Features. *Zeitschrift für Krist. - Cryst. Mater.* **2014**, *229*, 345–352.
- (4) Kurzydłowski, D.; Zaleski-Ejgierd, P. Hexacoordinated nitrogen(V) Stabilized by High Pressure. *Sci. Rep.* **2016**, *6*, 36049.
- (5) Mazej, Z.; Goreschnik, E.; Jagličić, Z.; Gawęł, B.; Łasocha, W.; Grzybowska, D.; Jaroń, T.; Kurzydłowski, D.; Malinowski, P.; Koźminski, W.; et al. KAgF<sub>3</sub>, K<sub>2</sub>AgF<sub>4</sub> and K<sub>3</sub>Ag<sub>2</sub>F<sub>7</sub>: Important Steps towards a Layered Antiferromagnetic fluoroargentate(II). *CrystEngComm* **2009**, *11*, 1702–1710.
- (6) Romiszewski, J.; Grochala, W.; Stolarczyk, L. Z. Pressure-Induced Transformations of Ag<sup>II</sup>F<sub>2</sub> — towards an “infinite Layer” d<sup>9</sup> Material. *J. Phys. Condens. Matter* **2007**, *19*, 116206.
